# Supplementary material
Source: publisher site journal article supplement (https://www.e-cmh.org/upload/media/cmh-2022-0205-Supplementary-Fig-3.pdf)
Supplement: Supplementary file 1 [file cmh-2022-0205-Supplementary-Fig-3.pdf]

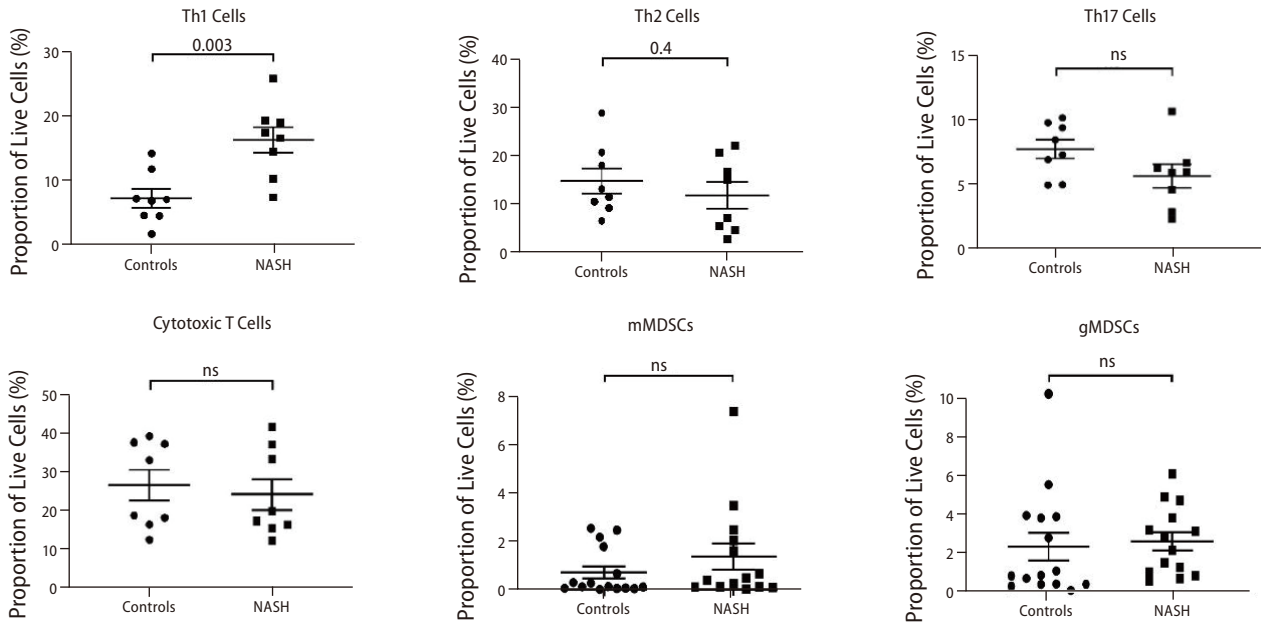

**Supplementary Figure 3.** Increased proportion of Th1 cells from PBMCs sampled from patients with NASH and fibrosis compared to healthy controls was confirmed by fluorescence flow cytometry. Proportions of Th1 cells were increased and Th2 cells were decreased in PBMCs sampled from patients with NASH and fibrosis compared to healthy controls when measured by flow cytometry. Proportions of Th17 cells did not differ between samples. No differences in cytotoxic T cells or MDSCs were observed between healthy controls and patients.
